# Supplementary material
Source: PubMed Central journal article supplement (PMC4844806)
Supplement: NIHMS763242-supplement-1.pdf [file NIHMS763242-supplement-1.pdf]

## Online Supplement

Eq. S1. The multilevel linear growth model applied to three longitudinal studies of aging.

$$y_{it} = \beta_{0i} + \beta_{1i} \text{Time}_i + \varepsilon_{it}$$

$$\beta_{0i} = \gamma_{0.0} + \gamma_{0.1} \text{SEX}_i + \gamma_{0.2} \text{AGE}_i + \gamma_{0.3} \text{ED}_i + \gamma_{0.4} \text{SMOKED}_i + \gamma_{0.5} \text{STK}_i + \gamma_{0.6} \text{HTN}_i + \gamma_{0.7} \text{DM}_i + \gamma_{0.8} \text{HTNDM}_i$$

$$\beta_{1i} = \gamma_{1.0} + \gamma_{1.1} \text{SEX}_i + \gamma_{1.2} \text{AGE}_i + \gamma_{1.3} \text{ED}_i + \gamma_{1.4} \text{SMOKED}_i + \gamma_{1.5} \text{STK}_i + \gamma_{1.6} \text{HTN}_i + \gamma_{1.7} \text{DM}_i + \gamma_{1.8} \text{HTNDM}_i$$

where

$y_{it}$  - performance scores on a cognitive test of individual  $i$  at time  $t$

$\beta_{0i}$  - unique intercept of individual  $i$

$\beta_{1i}$  - unique slope of individual  $i$

$\text{Time}_i$  - time in study, unique to each individual

$\varepsilon_{it}$  - residual of individual  $i$  at time  $t$

$\gamma_{0.0}$  - main effect on the random intercept

$\gamma_{1.0}$  - main effect on the random slope

$\gamma_{0.1}, \gamma_{0.2}, \dots, \gamma_{0.15}$  - fixed effects of corresponding predictors on the random intercept

$\gamma_{1.1}, \gamma_{1.2}, \dots, \gamma_{1.15}$  - fixed effects of corresponding predictors on the random slope

$u_{0i}$  - variance of unique intercept

$u_{1i}$  - variance of unique slope

$\text{SEX}$  - sex at baseline, dichotomous

$\text{AGE}$  - age at baseline in years

$\text{ED}$  - education at baseline in years

$\text{SMOKED}$  - ever/never smoking status at baseline, dichotomous

*STK* - baseline diagnosis of stroke, dichotomous

*HTN* - baseline diagnosis of hypertension, dichotomous

*DM* - baseline diagnosis of diabetes mellitus, dichotomous

*HTNDM* – *HTN*\**DM* interaction term

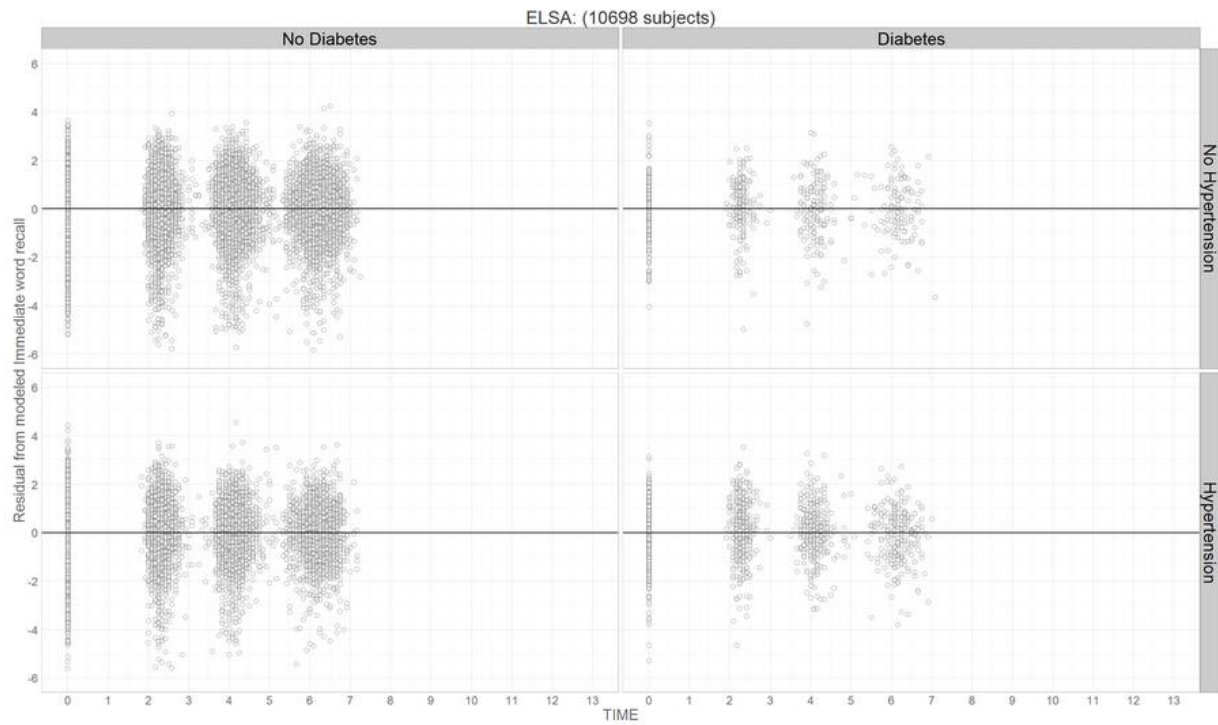

Figure S1. Plot of residual distributions assumed across diagnostic groups for the ELSA study.

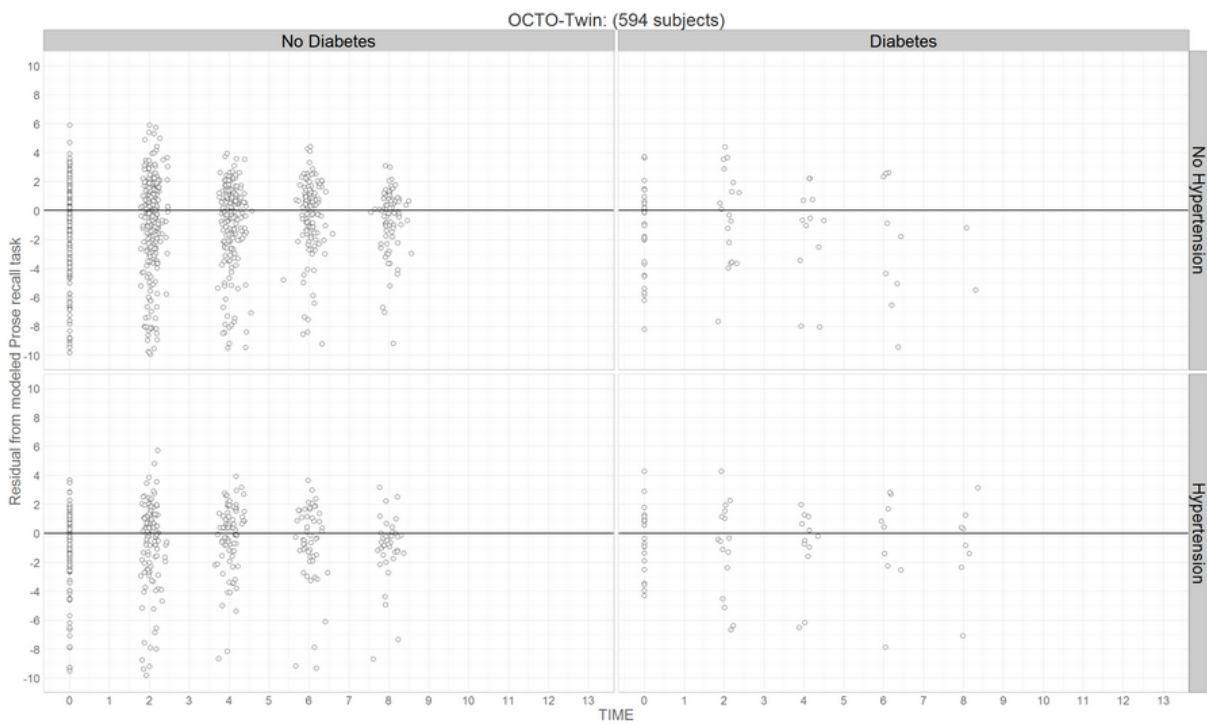

Figure S2. Plot of residual distributions assumed across diagnostic groups for the OCTO-Twin study.

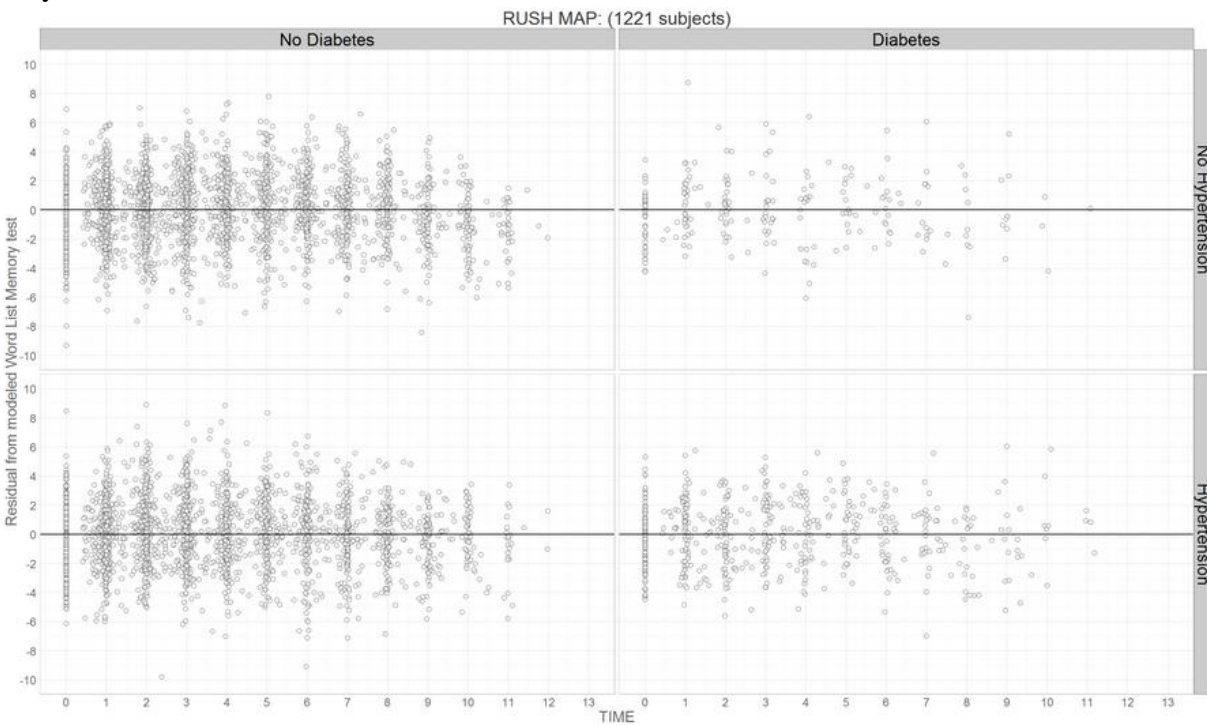

Figure S3. Plot of residual distributions assumed across diagnostic groups for the Rush MAP study (CERAD).

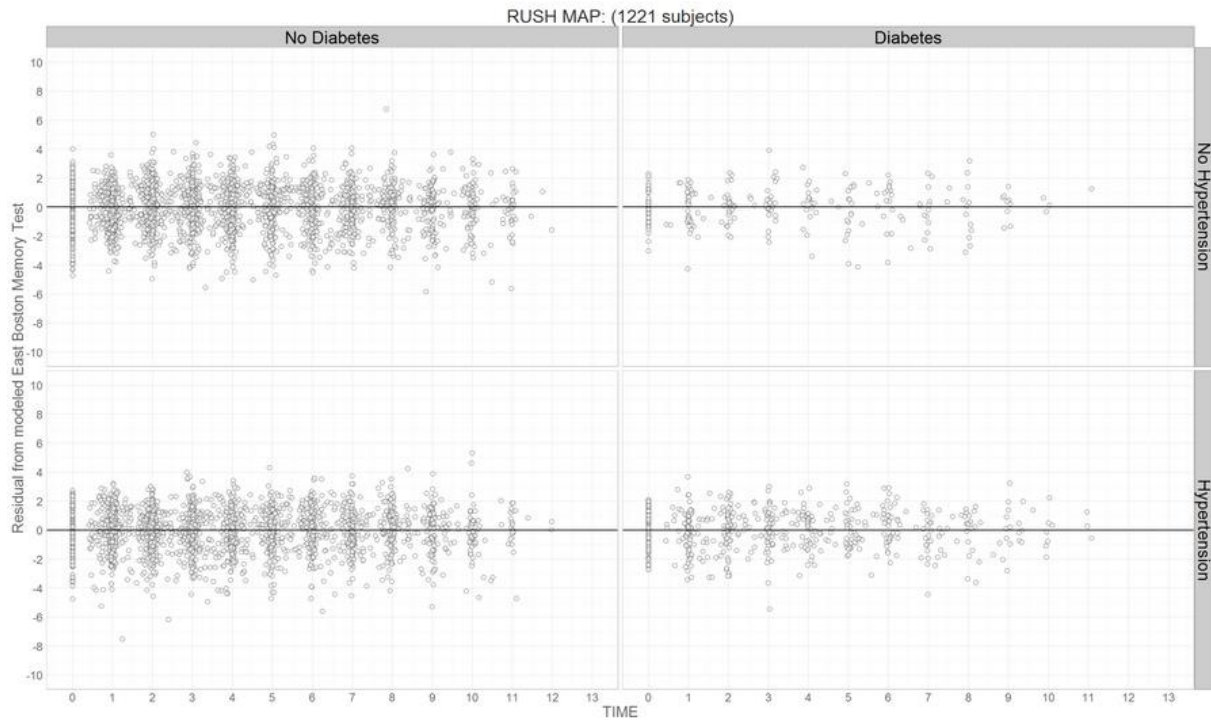

Figure S4. Plot of residual distributions assumed across diagnostic groups for the Rush MAP (EBMT) study.

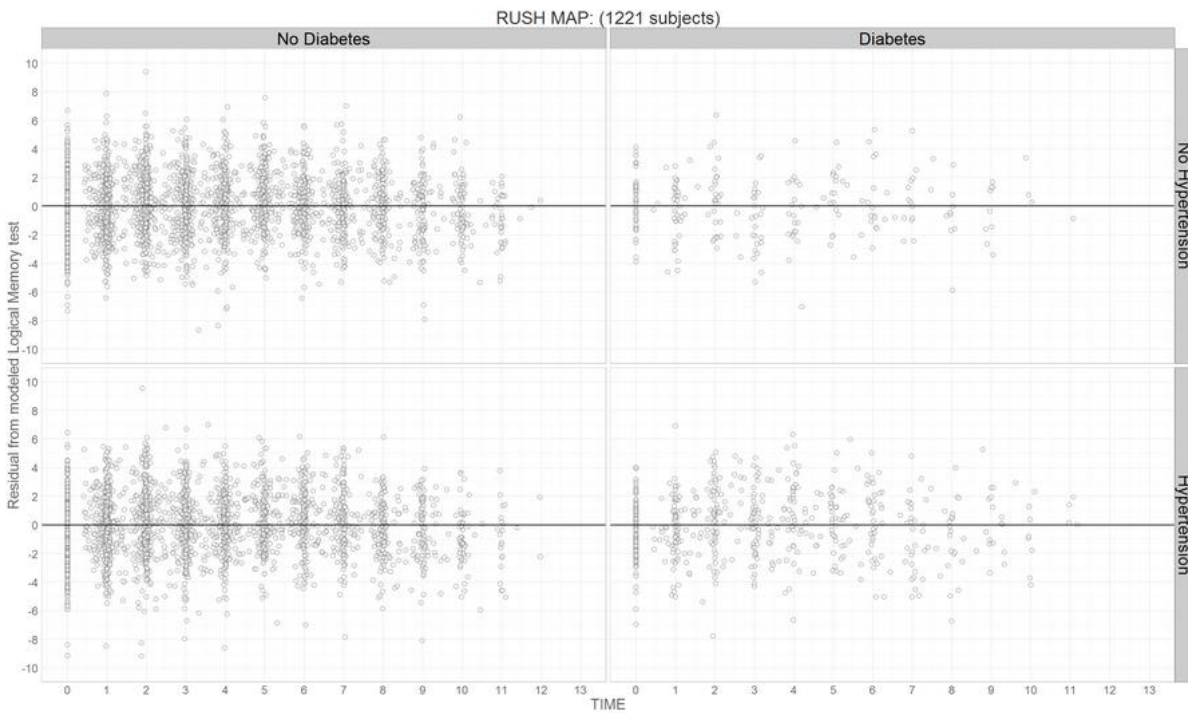

Figure S5. Plot of residual distributions assumed across diagnostic groups for the Rush MAP (Logical Memory test) study.
